# Supplementary material for: Angry pathogens, how to get rid of them: introducing microfluidics for waterborne pathogen separation to children
Source: Royal Society of Chemistry journal article supplement (doi:10.1039/c4lc00944d), 2014-11-19
Supplement: c4lc00944d1.pdf [file c4lc00944d1.pdf]

1 **Angry pathogens, how to get rid of them: introducing microfluidics for**  
2 **waterborne pathogen separation to children**

3 Melanie Jimenez<sup>1</sup> and Helen L. Bridle<sup>1\*</sup>

4 **SUPPLEMENTARY INFORMATION**

5  
6 **STEP-BY-STEP PROCEDURE FOR MODULE 2-IMS**

7  
8 **1. Particles in FIMO<sup>®</sup> polymer clay.**

9 Different blocks of FIMO<sup>®</sup> have been used to create the good and bad particles. The FIMO<sup>®</sup>  
10 is a soft polymer clay that can easily be moulded by hands (S1-Left). The simplest option is to create  
11 spherical particles by rolling the FIMO<sup>®</sup>. The size of bad pathogens is here roughly 1.6 cm in  
12 diameter and the yellow ones 1.1 cm. Non spherical particles can also be shaped although depending  
13 on their size, they can be blocked above a post in the DLD device or have some difficulty to roll down  
14 in the microfluidic-based IMS. Several tutorials are proposed on the Internet to create Angry Birds<sup>®</sup>  
15 with FIMO<sup>®</sup>. One of them has been used here for the eyes of pathogens (red and brow particles). Eyes  
16 can also be painted for easing the process although it needs to be waterproof if experiments have to be  
17 carried with water. For experiments dealing with IMS, two sets of red particles are modelled: one set  
18 with a small magnet inside (Figure S1-Right) and one set without. Small white particles are also  
19 shaped with a magnet inside to mimic the antibody-coated magnets (Figure 4 bottom in the paper).  
20 Magnets are placed before baking the FIMO<sup>®</sup>.

21

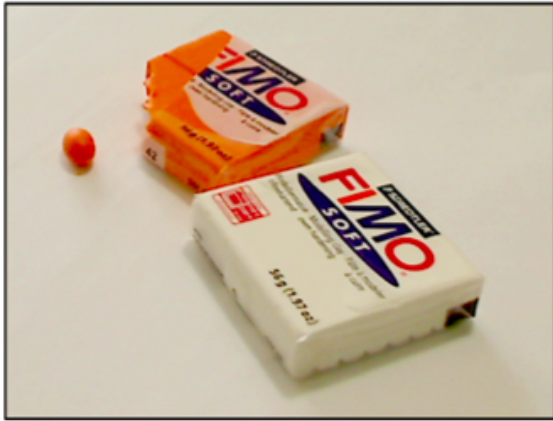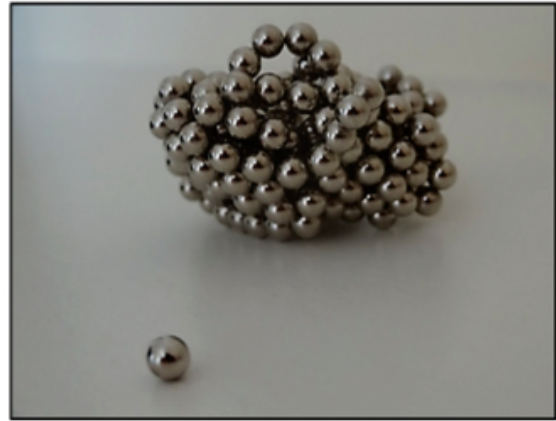

22

23

24 *SI. Left: FIMO® polymer clay. Reproduced from <http://en.wikipedia.org/wiki/Fimo>. Right: Magnetic*  
25 *beads incorporated in soft polymer clay before baking.*

26

27 At the end, a set of red bad particles with and without magnet, white small particles with magnet and  
28 yellow, brown and green particles without magnet is baked during 30 minutes at 110°C. A transparent  
29 polish can be applied on the beads after baking to avoid colour deterioration with time.

30

### 31 2. Without Antibodies...

32 For the first experiment, red particles without magnet, brown, yellow, brown and green ones  
33 are placed with water in a cup. A strong magnet is used to try to remove the  
34 particles...unsuccessfully.

35

### 36 3. With Antibodies...

37 Then a new cup is used with red particles containing magnets. Children can then add white  
38 antibodies to the water and see that they are attracted to the red particles. Then using a strong magnet  
39 above the cup, all the red particles can easily be removed in one shot. Evidently, the red particles are  
40 now magnetic and would be removed without the “antibodies” so it is advisable to control the use of  
41 the magnet carefully.

42

43

44 **STEP-BY-STEP PROCEDURE FOR MODULE 3-Microfluidics**

45 **1. Base in FIMO® polymer clay.**

46 FIMO® is used again to build the microchannel. A FIMO® block is flattened using a rolling  
47 pin until the thickness of the device is satisfactory (few millimetres here). Edges are then cut using a  
48 mould for cakes (roughly 5 cm in length here). Then a mould is required to create the channel. Here,  
49 we used wooden letters available in craft shops. The mould is pressed in the FIMO® block until  
50 obtaining a satisfactory thickness to allow the liquid to flow (1 mm here) (S3-left). Inlets and outlets  
51 are then created using a toothpick (S3-right). The channel is baked during 30 minutes; a weight can be  
52 used during the baking to ensure the top surface is flat.

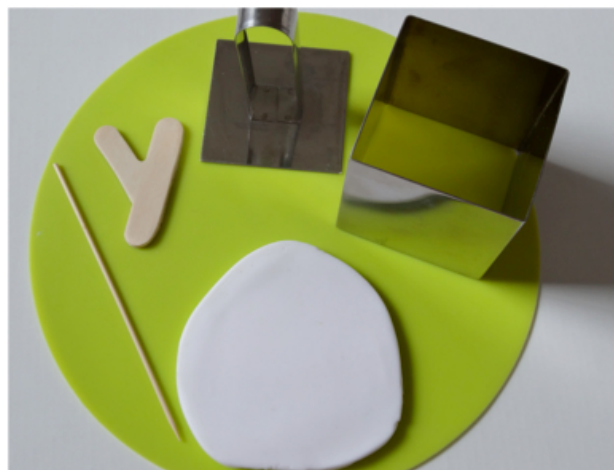

53

54 *S2. Microfluidic channel with FIMO®.*

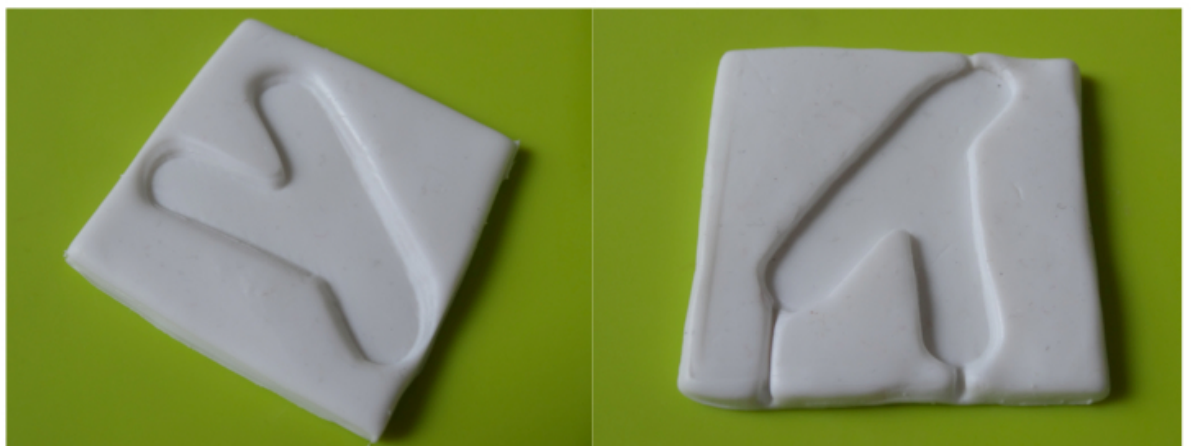

55

56 *S3. Y-shape channel (left) without inlet/outlet and with inlet/outlets (right) made with a toothpick.*

57

## 58 **2. Plexiglas and Silicon**

59 Plexiglas is used to close the channel. Plexiglas can be bought in a DIY shop and cut there.  
60 Here the Plexiglas is approximately 4 mm thick. A piece of Plexiglas is placed above the channel and  
61 bonded with transparent silicon for bathroom. Silicon is placed near the channel to avoid any leakage  
62 of the liquid outside the channel (Y shape here). Specific attention is required near the inlet/outlet to  
63 avoid clogging.

64

## 65 **3. Liquid injection**

66 After 24 hours (when the silicon is dry), liquid can be injected via the holes. Here a needle-tip  
67 plastic bottle (found in a craft shop) is filled with red squash in the device (S4). After use, the system  
68 needs to be cleaned with water to avoid any decolouration of the FIMO®. Note that food dye can also  
69 be used for colouring the water.

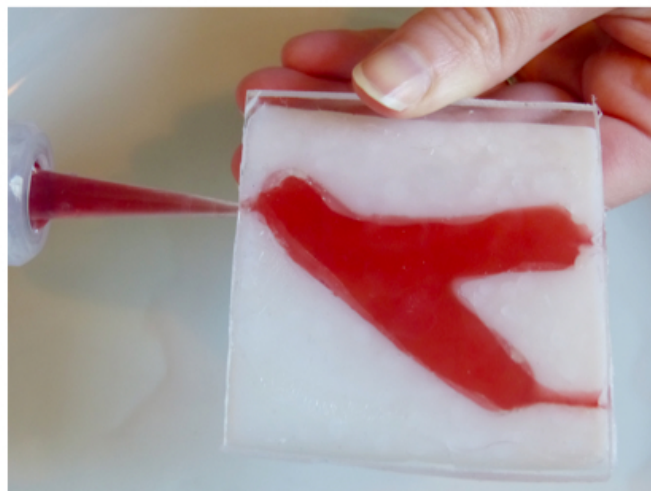

70

71

*S4. Injection of squash in the device.*

72

73

74

75

76

77

## 78 **STEP-BY-STEP PROCEDURE FOR MODULE 4-Microfluidic-based IMS**

### 79 **1. Y-channel**

80 Using Plexiglas, a Y-channel is created (dimensions in the paper) by cutting different  
81 rectangular pieces then fixed with silicon. Angle brackets are used at each straight angle to support the  
82 system (in white in Figure 6). A small support is also glued on the side of the channel to support the  
83 magnet while being easily removable by children. A simplest version of this system can be realised  
84 using a flat plastic bottle for instance (S5).

85

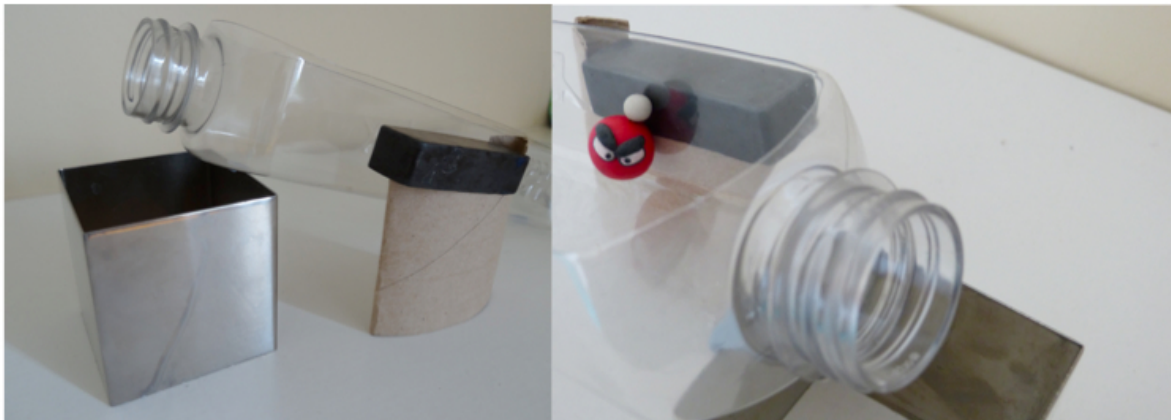

86

87 *S5. Microfluidic IMS with a plastic bottle*

88

### 89 **2.Piezo-electric sensor**

90 The piezoelectric sensor used for this experiment is presented in Figure S6.

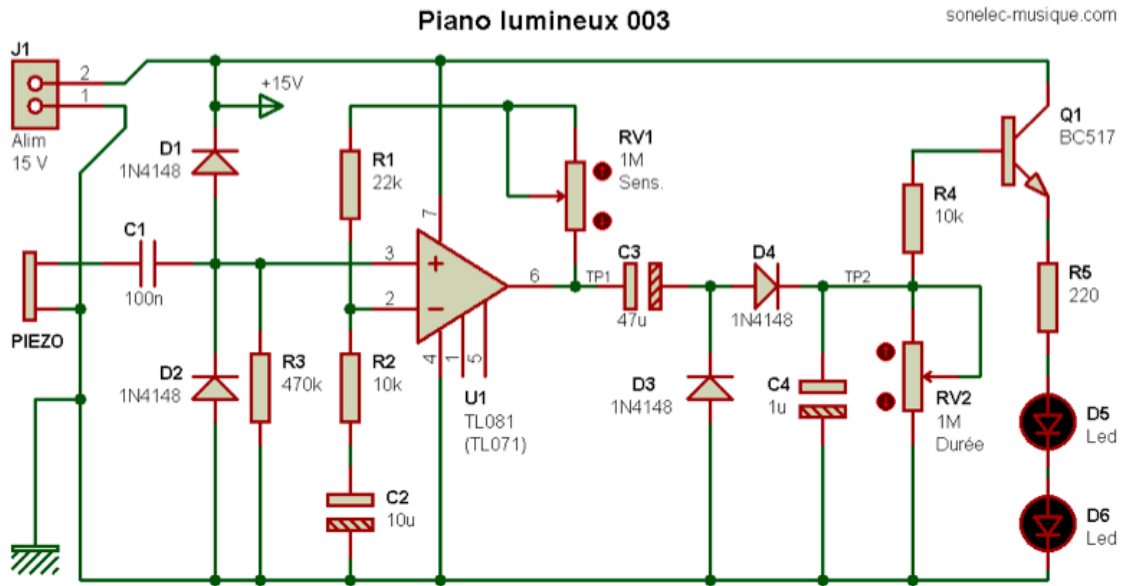

91

92

Figure S6. Piezoelectric sensor. Extracted from [http://www.sonelec-](http://www.sonelec-musique.com/electronique_realisations_piano_lumineux_003.html)  
[musique.com/electronique\\_realisations\\_piano\\_lumineux\\_003.html](http://www.sonelec-musique.com/electronique_realisations_piano_lumineux_003.html)

93

94 *C* means capacitance, *D* diode, *R* resistance, *U* operational amplifier, *RV* is a potentiometer and *Q* a  
 95 transistor.

96 Several tutorials are available on the web for “in-house” piezoelectric sensor-based vibration  
 97 detector. This one was originally used for detecting percussions of certain musical  
 98 instruments. Although the circuit can seem complex, each electrical compound, whose  
 99 characteristics are presented in Figure S6, has been found easily in specialised shops. A  
 100 solderless breadboard is used to avoid the use of solder and have a reusable system. The  
 101 ceramic piezo (PIEZO in Figure S6) is fixed on the wall of the Y-channel with transparent  
 102 bluetack. When the sensor detects a vibration, a current is generated that will here turn on a  
 103 red LED (Led in Figure S6). The vibration is created here by the shocks of magnetic  
 104 particles bumping onto the magnet. A piece of foam (sheet of blue foam bought in a craft  
 105 shop here) is used to absorb the vibrations created by particles entering in the channel (*cf.*  
 106 Figure 6).

107

108

109

### **3. Experiment**

110

The microfluidic-based experiment is similar to the standard IMS (Module 2). First beads without magnet are passed through the channel. They will roll down by gravity since the device is inclined. If the left outlet is blocked (here with a piece of flexible plastic, missing part of the bottle in Figure S5), all the particles will finish in the right outlet. Note that by simply using a flexible piece of plastic, the water will flow in both outlets but not the particles. Then a new set of beads is used. This time with red magnetic beads preliminary mixed with white antibodies. Note that red pathogens with more than one white bead tend to stagnate in the device; they will thus not roll smoothly in the channel. Once red pathogens are trapped by the magnet, the red light will turn on. The right outlet needs to be closed and the left one opened (by displacing the piece of flexible plastic). By removing the magnet, red pathogens will roll in the left outlet and thus will be separated from the other particles.

121

122

### **STEP-BY-STEP PROCEDURE FOR MODULE 5-DLD**

123

#### **1. LEGO® board and posts**

124

LEGO® posts are placed on the LEGO® board with the geometry presented in Figure S7. This geometry allows particles above 1.5  $\mu\text{m}$  to follow the blue path while smaller ones have an ultimate straight path. For each post, two LEGO® posts are superimposed to create one taller post to avoid particles to quit the DLD device. The LEGO® board is placed in a vase (28 cm in length, 18 cm in height and 8 cm in depth). It can be noted however that a higher vase would allow a better separation effect to be visualised by children.

129



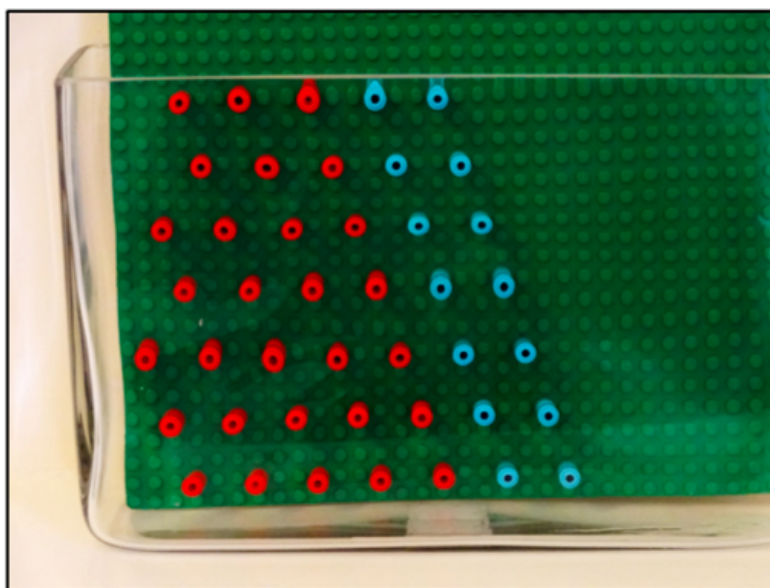

130

131 *Figure S7. DLD using LEGO®. Particles are introduced at the top of the vase, between the two blue*  
132 *posts. Small particles follow an ultimate straight path and thus finish between red posts while large*  
133 *particles follow the blue path.*

134

## 135 **2. Shower gel**

136 To reproduce the slow motion characteristic of microfluidics, a viscous liquid is  
137 needed. Here transparent shower gel is used. Depending on its viscosity, dilution may be  
138 needed. However, mixing shower gel with water will create a lot of bubbles and foam and a  
139 certain time is required before being able to use the solution. Here, when the red pathogens  
140 were injected between the two blue posts at the top of the board, they needed roughly 7  
141 seconds to reach the bottom of the vase.

142

## 143 **3. Experiments**

144 Particles must be injected near the board always between the two blue posts. Red and  
145 brown particles will follow the blue path; yellow and green ones a red path. It can be noted  
146 that if particles are too small, they tend to stagnate above posts. In order to ease the injection,  
147 tweezers were used by children (chopsticks for learners). Removing the particles at the



148 bottom of the vase can be quite tricky, tweezers were used here. It can be noted that posts can  
149 be glued to the posts to avoid damage during the experiments. Magnetic beads can also be  
150 incorporated in all the particles to be used for the LEGO DLD and then be removed using  
151 magnets. However, the deviation should be large enough to avoid attraction of particles in the  
152 vase.

153

## 154 **STEP-BY-STEP PROCEDURE FOR MODULE 6-Fluorescent microscopy**

### 155 **1. Fluorescent microscope**

156 The fluorescent microscope consists of an insect magnifier placed in a tissue box in  
157 cardboard (available in craft shops) (Figure S8). The box is painted inside in black. The  
158 magnifier is then placed in the box with the top of the magnifier passing through the holes for  
159 tissues (Figure S9). Black paper is used to block light in the top part of the magnifier that is  
160 not in the box (Figure S8-Right).

161

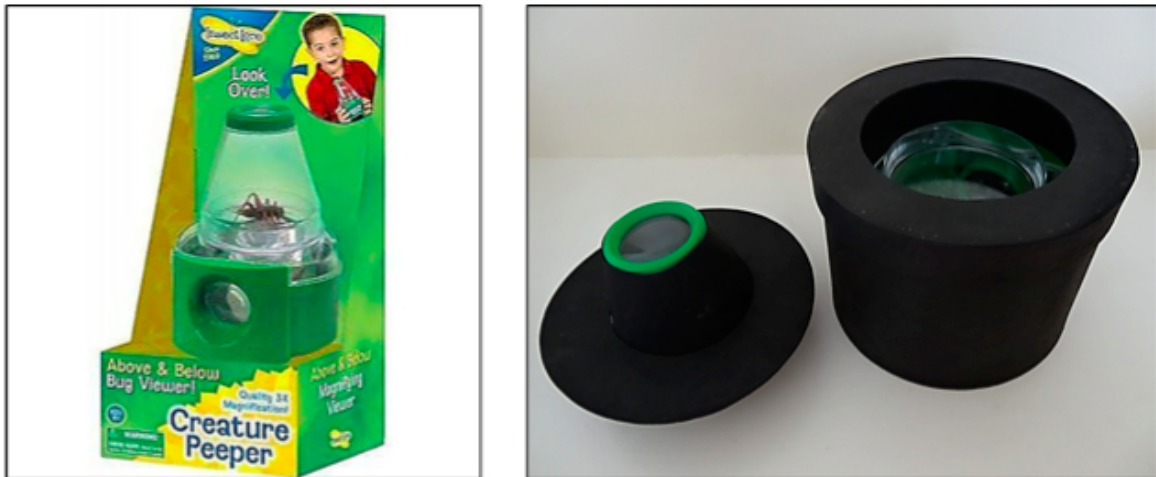

162

163 *Figure S8. Left: Insect magnifier used for reproducing the microscope. Right: Black cardboard box*  
164 *with the magnifier to visualize by fluorescence the magnetic beads trapped onto the bad red particles.*

165

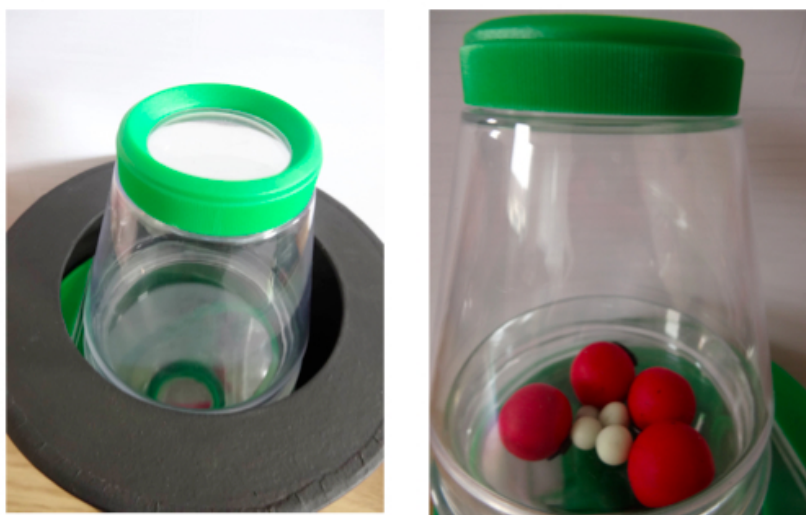

166

167 *Figure S9. Insect magnifier in the cardboard box without (left) and (right) with beads before blocking*  
168 *the light with paper on the top of the magnifier. The final microscope is presented in Figure S8-Right.*

169

## 170 **2. Experiment**

171 The FIMO<sup>®</sup> used for antibodies is fluorescent. When placed under a lamp for few minutes and then in  
172 the dark, the FIMO<sup>®</sup> glows. By placing the red particles with magnets and the white beads with  
173 magnets, detection by fluorescence can be performed (S9). It can be noted however that the  
174 fluorescence signal of the FIMO<sup>®</sup> can be quite low. Placing the beads near a lamp right before the  
175 experiment for few seconds will ease the visualization.
